# Supplementary material for: The human DEPhOsphorylation Database DEPOD: 2019 update
Source: Oxford University Press journal article supplement (doi:10.1093/database/baz133), 2019-01-01
Supplement: depod_supplementary_data_r1_baz133.pdf [file depod_supplementary_data_r1_baz133.pdf]

**Supplementary Data to:**

**The human DEPhOosphorylation Database DEPOD: 2019 update**

Nikhil P. Damle<sup>1</sup>, Maja Köhn<sup>1,\*</sup>

<sup>1</sup>Signalling Research Centres BIOSs and CIBSS, Faculty of Biology, University of Freiburg, Schänzlestrasse 18, 79104 Freiburg, Germany

\* Correspondence: Email: [maja.koehn@bioss.uni-freiburg.de](mailto:maja.koehn@bioss.uni-freiburg.de)

## SUPPLEMENTARY FIGURES

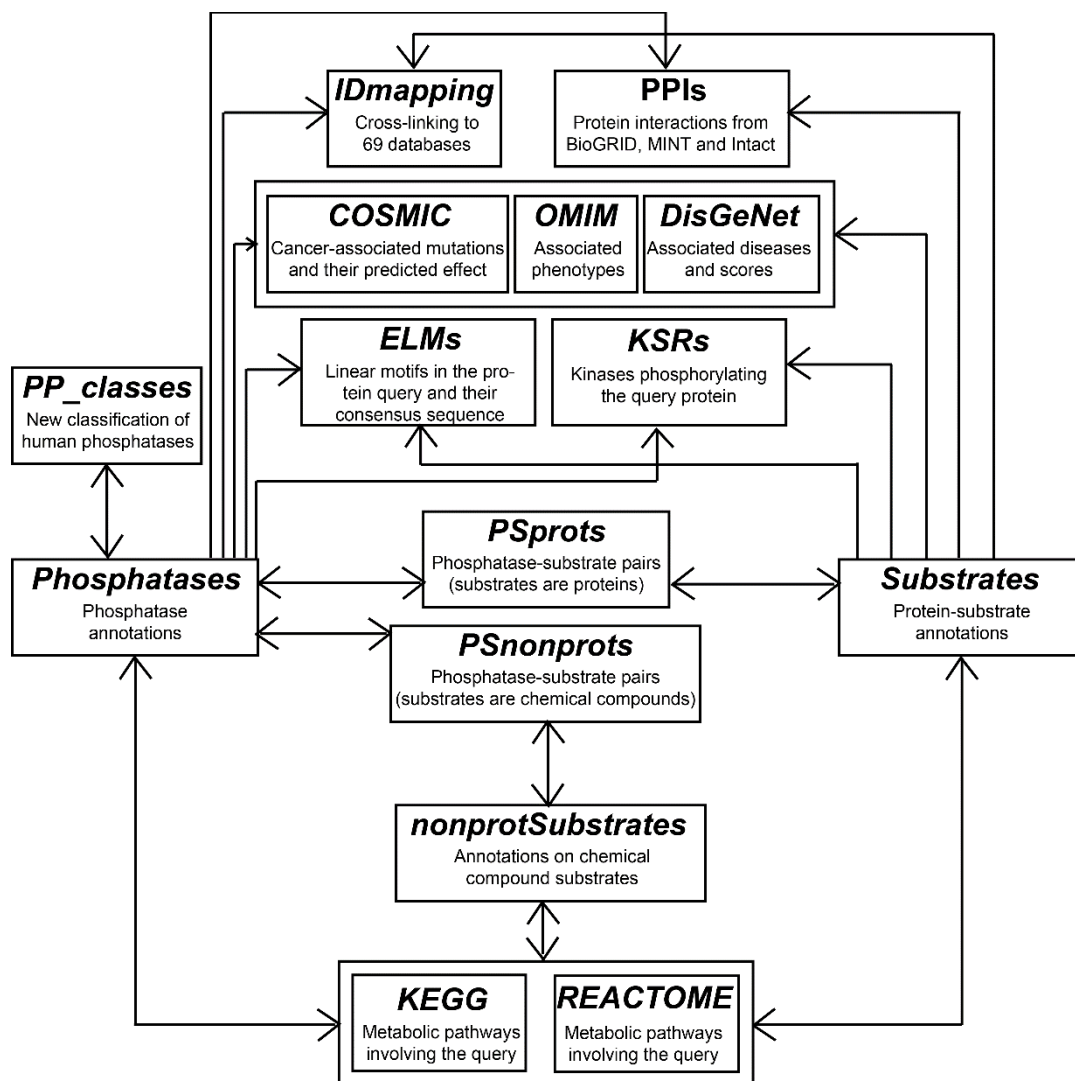

**Supplementary Figure S1: Entity relationship (ER) diagram for DEPOD.** This ER diagram depicts various core tables stored in DEPOD with a brief description of each. Arrow directions indicate interlinking and query possibilities among different tables facilitated via the web interface.

## CHEBI: 16905

| Basic Information                    | Phosphatases                                                                                                                                                                                                                                                                                                                                                                                                                                | Pathway |
|--------------------------------------|---------------------------------------------------------------------------------------------------------------------------------------------------------------------------------------------------------------------------------------------------------------------------------------------------------------------------------------------------------------------------------------------------------------------------------------------|---------|
| <b>Name</b>                          | keto-D-fructose 1,6-bisphosphate                                                                                                                                                                                                                                                                                                                                                                                                            |         |
| <b>Synonyms</b>                      | 01,6-di-o-phosphono-d-fructose;<br>D-fructose 1,6-bisphosphate;<br>D-fructose 1,6-bis(dihydrogen phosphate);                                                                                                                                                                                                                                                                                                                                |         |
| <b>Definition</b>                    | A ketohexose bisphosphate that is D-fructose substituted by phosphate groups at positions 1 and 6.                                                                                                                                                                                                                                                                                                                                          |         |
| <b>Molecular Weight (Exact mass)</b> | 340.1157 (339.996)                                                                                                                                                                                                                                                                                                                                                                                                                          |         |
| <b>Molecular Formula</b>             | C <sub>6</sub> H <sub>14</sub> O <sub>12</sub> P <sub>2</sub>                                                                                                                                                                                                                                                                                                                                                                               |         |
| <b>SMILES</b>                        | [H][C@@](O)(COP(O)(O)=O)[C@@]([H])(O)[C@]([H])(O)C(=O)COP(O)(O)=O                                                                                                                                                                                                                                                                                                                                                                           |         |
| <b>InChI</b>                         | InChI=1S/C6H14O12P2/c7-3(1-17-19(11,12)13)5(9)6(10)4(8)2-18-20(14,15)16/h3,5-7,9-10H,1-2H2,(H2,11,12,13)(H2,14,15,16)/t3-,5-,6-/m1/s1                                                                                                                                                                                                                                                                                                       |         |
| <b>InChI Key</b>                     | XPYBSIWDXQFNMH-UYFOZJQFSA-N                                                                                                                                                                                                                                                                                                                                                                                                                 |         |
| <b>Crosslinking annotations</b>      | <a href="#">KEGG:C00354</a>   <a href="#">3DMET:B04673</a>   <a href="#">CAS:488-69-7</a>   <a href="#">CHEBI:16905</a>   <a href="#">CHEBI:37736</a>   <a href="#">ChEMBL:CHEMBL1089962</a>   <a href="#">ChEMBL:CHEMBL2111113</a>   <a href="#">ChEMBL:CHEMBL97893</a>   <a href="#">KNApSAcK:C00007386</a>   <a href="#">NIKKAJI:J15.941G</a>   <a href="#">PDB-CCD:AFP</a>   <a href="#">PDB-CCD:FBP</a>   <a href="#">PubChem:3647</a> |         |

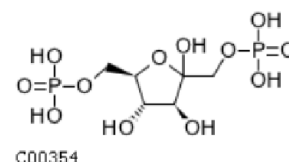

[Download: mol | sdf](#)

**Supplementary Figure S2: A typical non-protein substrate entry in DEPOD.** Several new annotations such as molecular formula, SMILES and InChI notations and InChI keys have been added. Cross-linking annotations to several small-molecule databases have been provided. Structures can also be downloaded in *.mol* and *.sdf* formats.

## SUPPLEMENTARY TABLE CAPTIONS

**Supplementary Table S1:** 186 GO terms with which human phosphatases have been compiled.

**Supplementary Table S2:** Human phosphatase genes in DEPOD and a comparison between their classification into Superfamilies, Families and Subfamilies by DEPOD, Phosphatome.NET, iEKPD and canonical or historical classification method.

**Supplementary Table S3:** PubMed IDs scanned during compilation of phosphatase-substrate pairs along with the rationale on why they were included or excluded from the current version.
